# Supplementary material for: An In Situ Study on Nanozyme Performance to Optimize Nanozyme-Strip for Aβ Detection
Source: MDPI journal article supplement (doi:10.3390/s23073414), 2023-03-24
Supplement: s1 [file s1]

# Supporting information

## An In Situ Study on Nanozyme Performance to Optimize Nanozyme-Strip for A $\beta$ Detection

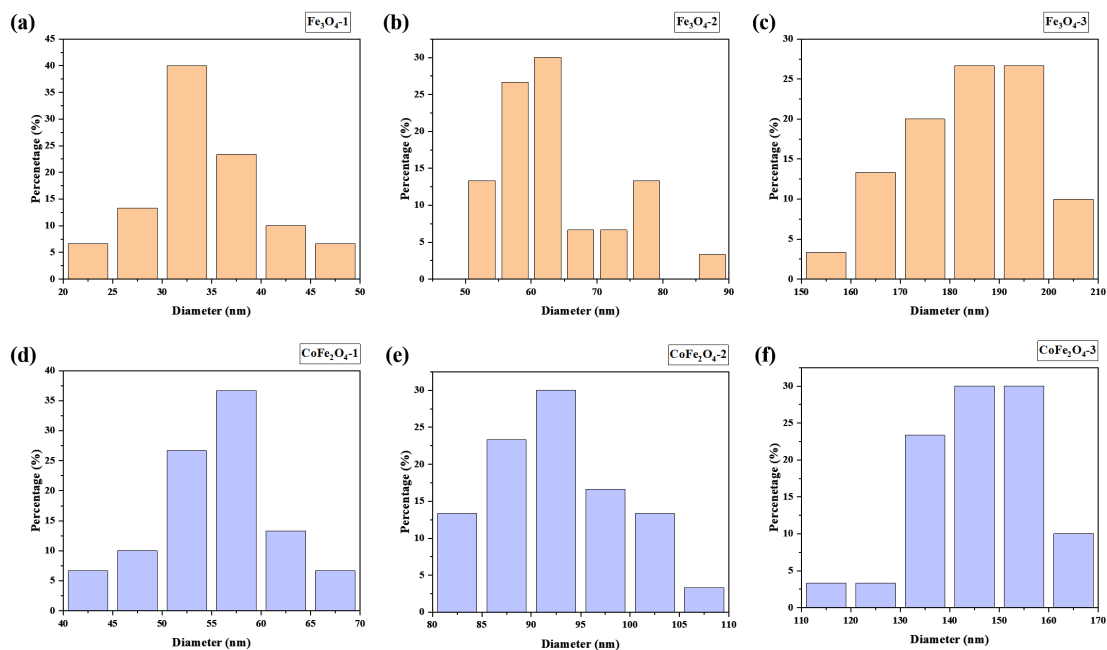

**Figure S1.** Particle size distribution of nanozymes (a)  $\text{Fe}_3\text{O}_4$ -1 nanozyme (b)  $\text{Fe}_3\text{O}_4$ -2 nanozyme (c)  $\text{Fe}_3\text{O}_4$ -3 nanozyme (d)  $\text{CoFe}_2\text{O}_4$ -1 nanozyme (e)  $\text{CoFe}_2\text{O}_4$ -2 nanozyme (f)  $\text{CoFe}_2\text{O}_4$ -3 nanozyme.

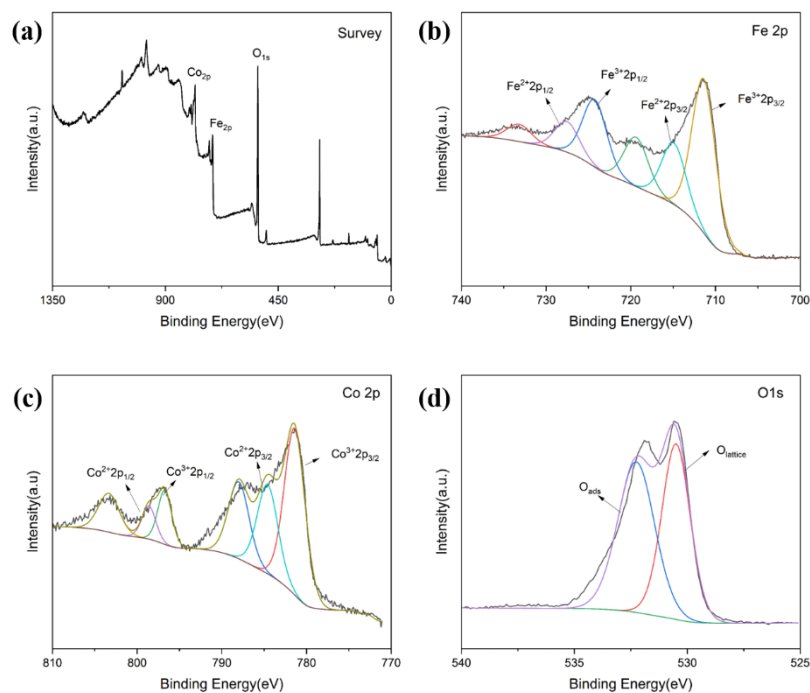

**Figure S2.** Characterization of  $\text{CoFe}_2\text{O}_4$  nanozyme by XPS. (a) Survey spectra of  $\text{CoFe}_2\text{O}_4$ . (b) High-resolution spectra of Fe 2p. (c) High-resolution spectra of Co 2p. (d) High-resolution spectra of O 1s.

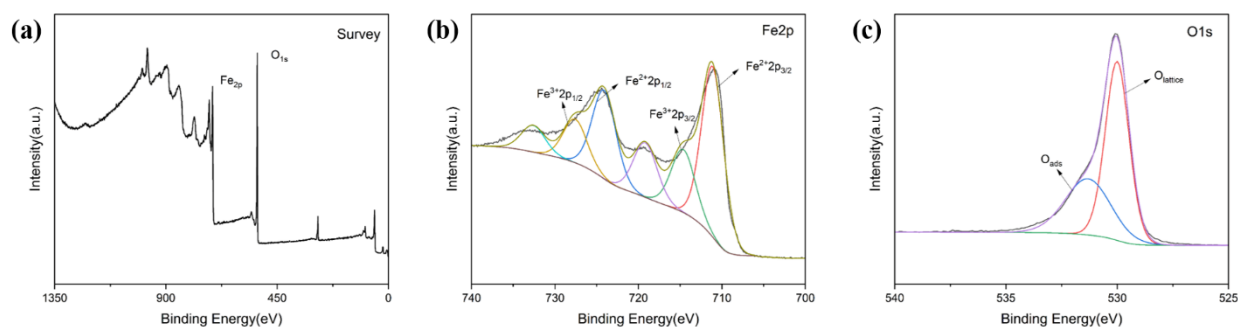

**Figure S3.** Characterization of  $\text{Fe}_3\text{O}_4$  nanozyme by XPS. (a) Survey spectra of  $\text{Fe}_3\text{O}_4$ . (b) High-resolution spectra of Fe 2p. (c) High-resolution spectra of O 1s.

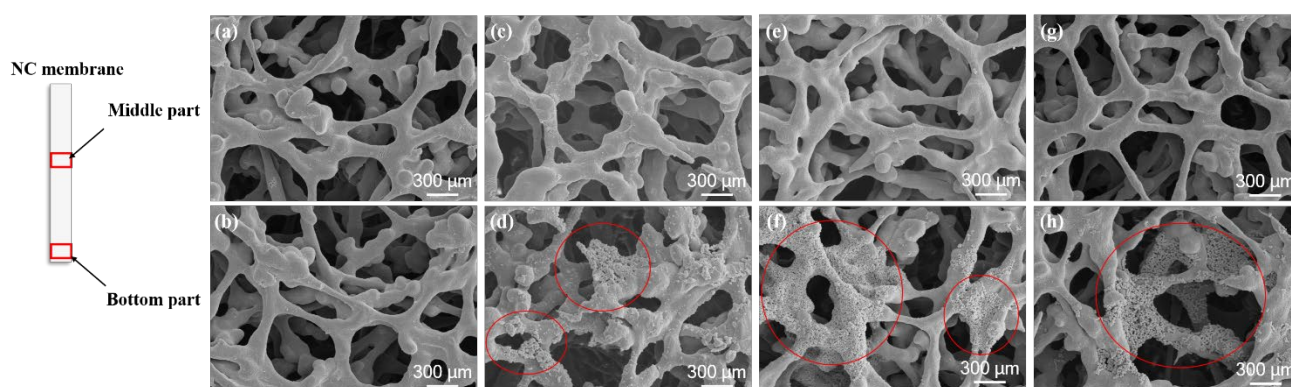

**Figure S4.** Characterization of  $\text{Fe}_3\text{O}_4$  nanozymes on NC membrane by SEM. (a) Middle part of blank NC membrane. (b) Bottom part of blank NC membrane. (c) Middle part of  $\text{Fe}_3\text{O}_4$ -1-NC membrane. (d) Bottom part of  $\text{CoFe}_2\text{O}_4$ -1-NC membrane. (e) Middle part of  $\text{Fe}_3\text{O}_4$ -2-NC membrane. (f) Bottom part of  $\text{Fe}_3\text{O}_4$ -2-NC membrane. (g) Middle part of  $\text{Fe}_3\text{O}_4$ -3-NC membrane. (h) Bottom part of  $\text{Fe}_3\text{O}_4$ -3-NC membrane.

**Table S1.** PDI of nanozymes detected by DLS.

|     | $\text{CoFe}_2\text{O}_4$ -1 | $\text{CoFe}_2\text{O}_4$ -2 | $\text{CoFe}_2\text{O}_4$ -3 | $\text{Fe}_3\text{O}_4$ -1 | $\text{Fe}_3\text{O}_4$ -2 | $\text{Fe}_3\text{O}_4$ -3 |
|-----|------------------------------|------------------------------|------------------------------|----------------------------|----------------------------|----------------------------|
| PDI | 0.053                        | 0.052                        | 0.066                        | 0.266                      | 0.257                      | 0.274                      |
